# Supplementary material for: Passivation of triple cation perovskites using guanidinium iodide in inverted solar cells for improved open-circuit voltage and stability
Source: Royal Society of Chemistry journal article supplement (doi:10.1039/d1se00156f), 2021-01-01
Supplement: d1se00156f1.pdf [file d1se00156f1.pdf]

## **Supplementary information**

### **Passivation of Triple Cation perovskites using Guanidinium Iodide in inverted solar cells for improved open-circuit voltage and stability**

**Aditya S. Yerramilli<sup>1</sup>, Yuanqing Chen<sup>1,2</sup>, Terry Alford<sup>1,3\*</sup>**

**<sup>1</sup>School for Matter, Transportation and Energy, Arizona State University, AZ, 85282, United States**

**<sup>2</sup>Department of Materials Physics and Chemistry, Xi'an University of Technology, Xi'an, 710048, China**

**<sup>3</sup>Materials Science Program, African University of Science and Technology, Abuja FCT, Nigeria**

**\*Corresponding author: Prof. Alford ([TA@asu.edu](mailto:TA@asu.edu))**

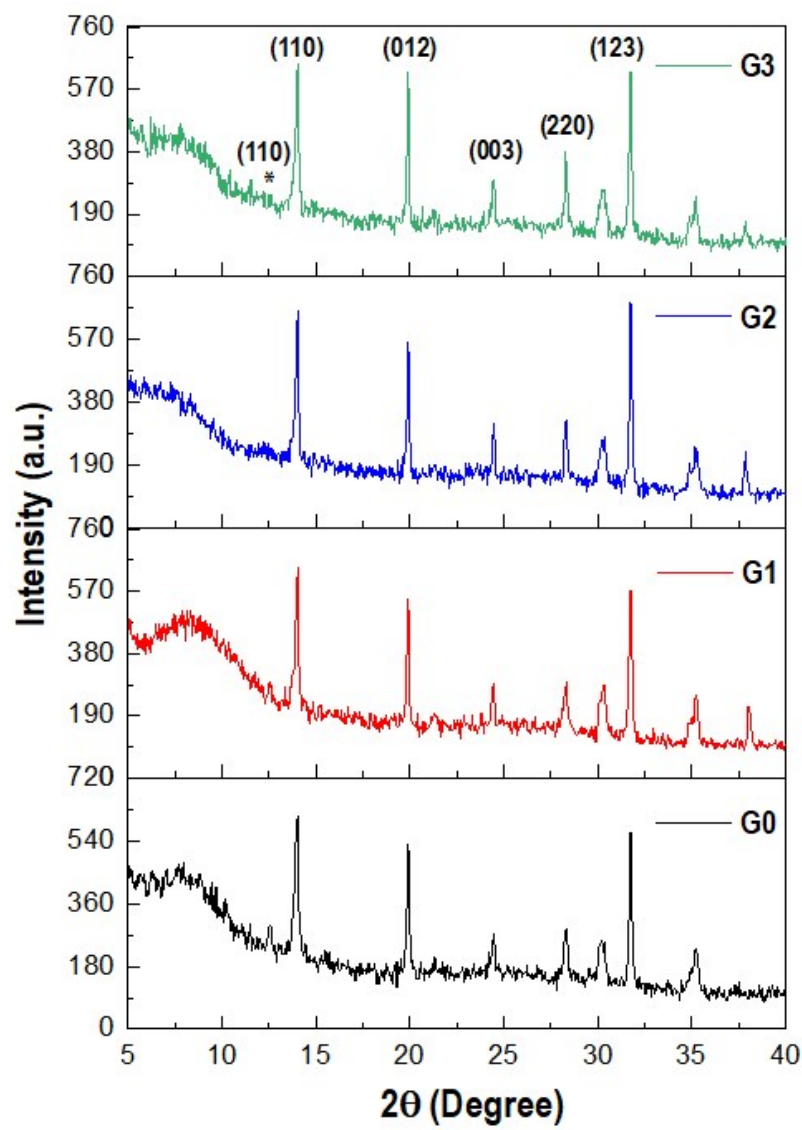

Fig. S1. XRD spectra of perovskite with different GUAI loading conditions prepared on ITO/glass (\* represents  $\text{PbI}_2$ )

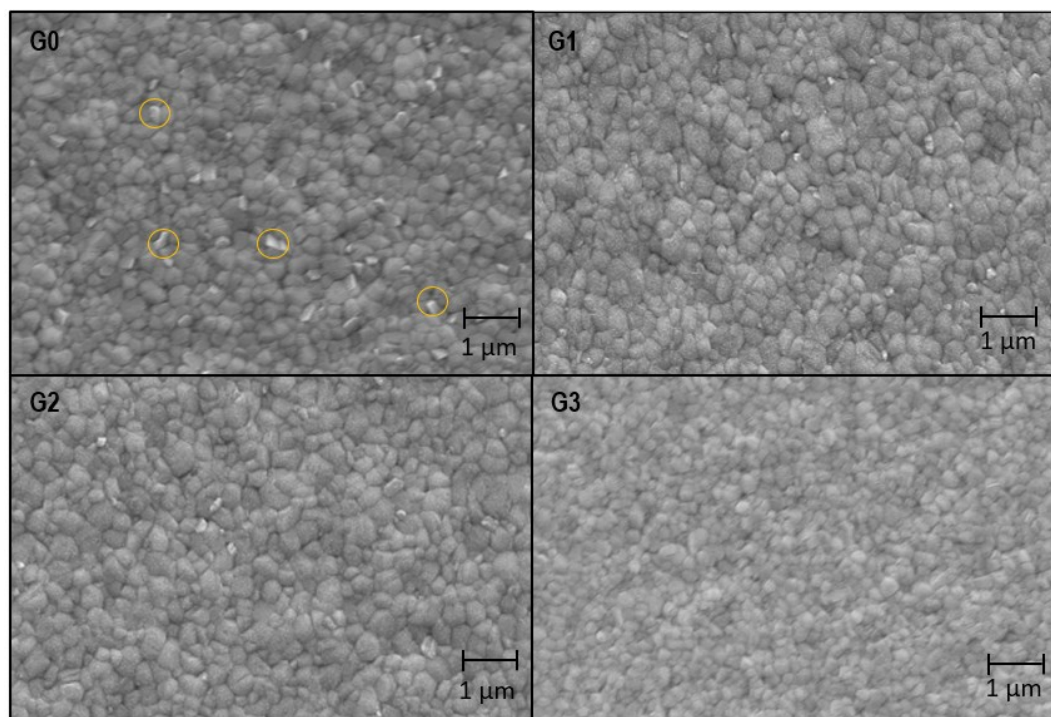

Fig. S2. SEM images of perovskite with different GUAI loading conditions prepared on an ITO/glass substrate

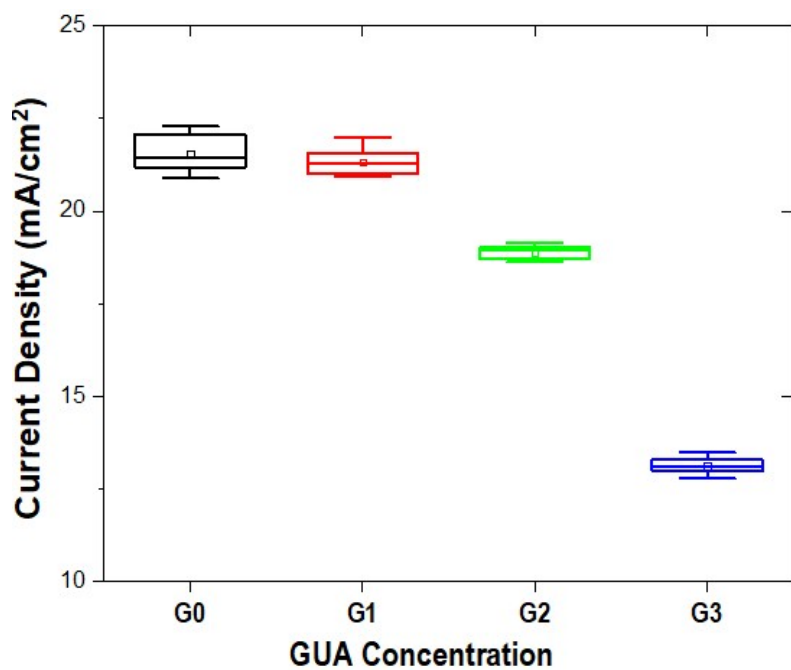

Fig. S3. Box plot of  $J_{sc}$  for perovskite control with different GUAI loading conditions

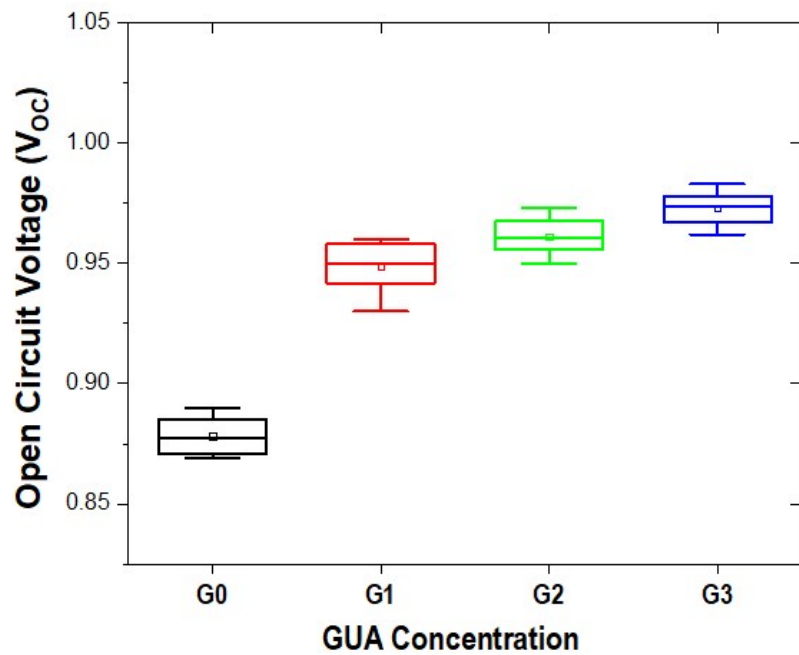

Fig. S4. Box plot of  $V_{OC}$  for perovskite control with different GUA loading conditions

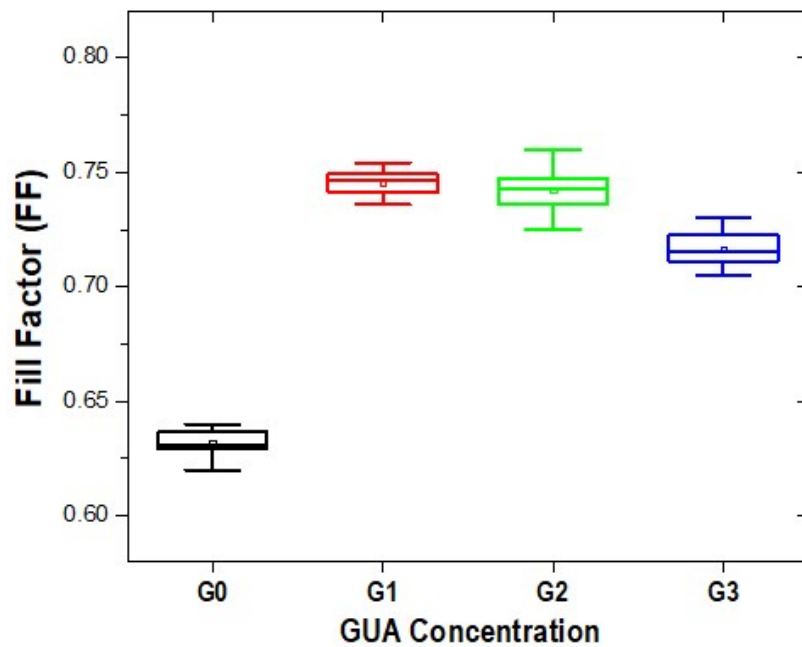

Fig. S5. Box plot of FF for perovskite control with different GUA loading conditions

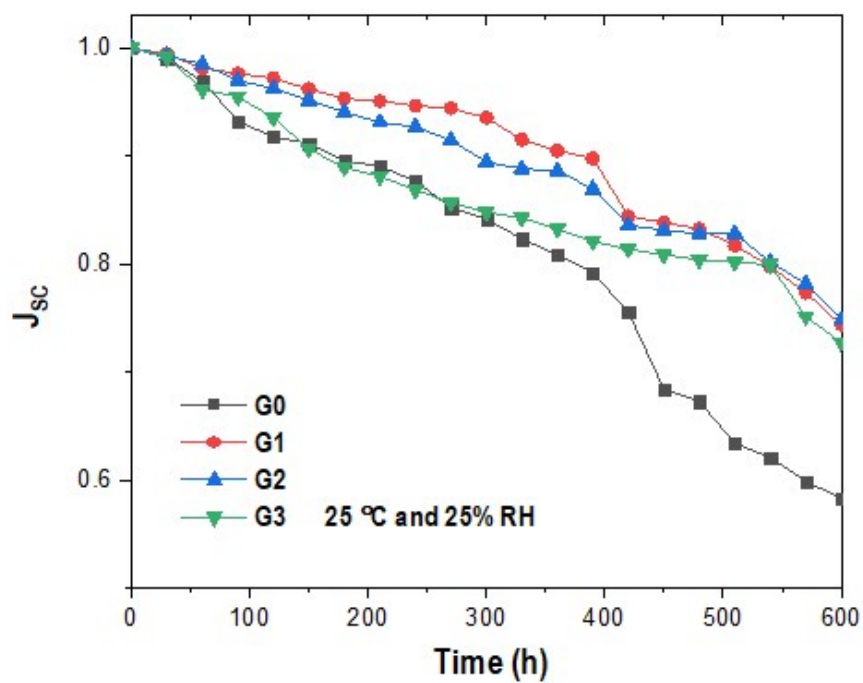

Fig. S6.  $J_{SC}$  decay of perovskite control device with different GUAI loading conditions

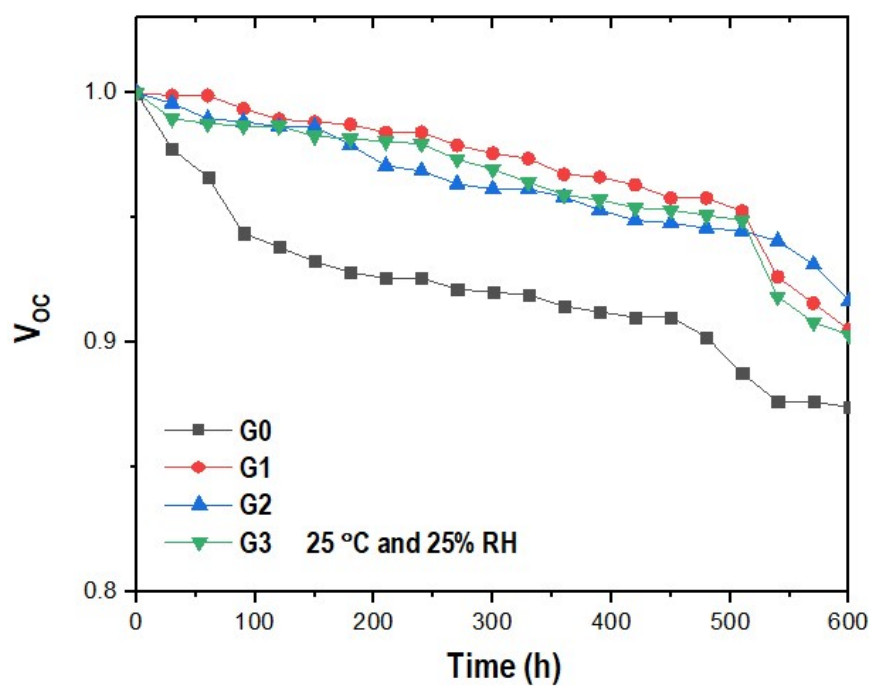

Fig. S7.  $V_{OC}$  decay of perovskite control device with different GUAI loading conditions

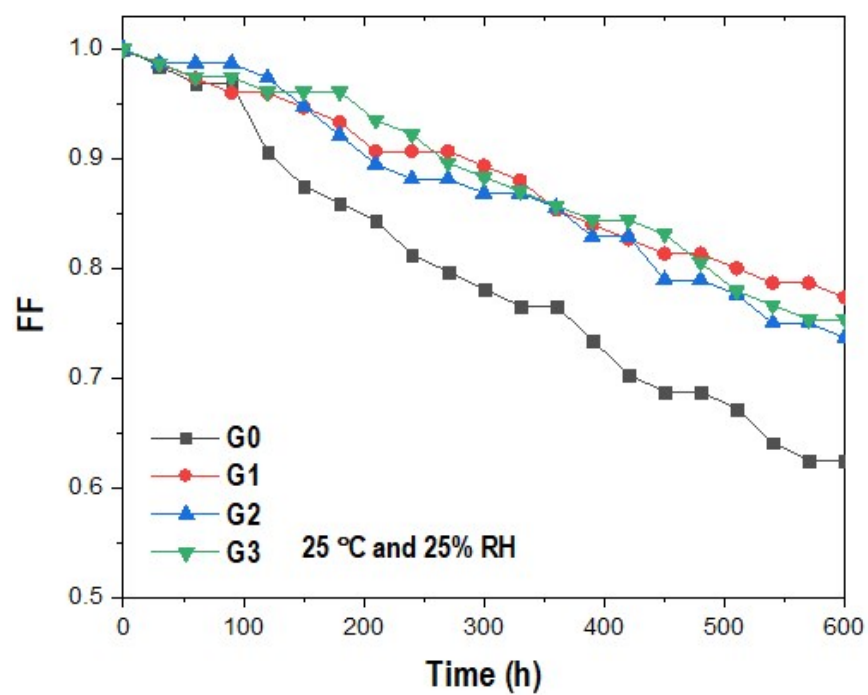

Fig. S8. FF decay of perovskite control device with different GUAI loading conditions
